1 **Temperature and relative humidity are not major contributing factor on the occurrence**  
2 **of COVID-19 pandemic: An observational study in 57 countries (2020-05-08)**

3 Md. Abdus Sobur,<sup>1</sup> Md. Saiful Islam,<sup>1</sup> Md. Emdadul Haque,<sup>2</sup> AMM Taufiqer Rahman,<sup>3</sup>  
4 Md. Taohidul Islam,<sup>4</sup> Antonio Toniolo,<sup>5</sup> Md. Tanvir Rahman<sup>1\*</sup>

5 <sup>1</sup>Department of Microbiology and Hygiene, Faculty of Veterinary Science, Bangladesh  
6 Agricultural University, Mymensingh 2202, Bangladesh.

7 <sup>2</sup>Faculty of Fisheries, Bangladesh Agricultural University, Mymensingh 2202, Bangladesh.

8 <sup>3</sup>Naogaon District Hospital, Naogaon, Bangladesh.

9 <sup>4</sup>Department of Medicine, Faculty of Veterinary Science, Bangladesh Agricultural  
10 University, Mymensingh 2202, Bangladesh.

11 <sup>5</sup>Global Virus Network, University of Insubria, 21100 Varese, Italy.

12 \*Corresponding Author: Md. Tanvir Rahman

13 Professor, Department of Microbiology and Hygiene, Faculty of Veterinary Science,  
14 Bangladesh Agricultural University, Mymensingh-2202, Bangladesh.

15 Phone: +8809167401-6 Ext. 6385, Mobile. +8801913323307, Fax: +8809161510.

16 Email: tanvirahman@bau.edu.bd

17

18 **Abstract**

19 The world searching for hope has already experienced a huge loss of lives due to COVID-19  
20 caused by SARS-CoV-2 started in Wuhan, China. There are speculations that climatic  
21 conditions can slowdown the transmission of COVID-19. Findings from the early outbreak  
22 indicated the possible association of air temperature and relative humidity in COVID-19  
23 occurrence in China. Current study focused on whether climatic conditions (temperature and  
24 relative humidity) are having any influence in the occurrence of COVID-19 when the  
25 outbreak has been classified as pandemic. To determine the effect of daily average  
26 temperature and average relative humidity on log-transformed total daily cases of COVID-19,  
27 polynomial regression as a quadratic term and linear regression were done. Linear regression  
28 analysis was also carried out to explore the same effect on selected countries. Present study  
29 observed no correlation between the climatic conditions (the daily average temperature and  
30 relative humidity) and the number of cases of COVID-19. Similar result was found in relation  
31 between daily average temperature and average number of cases per day in country-wise  
32 analysis. However, about 93.5% cases of COVID-19 occurred between 1<sup>0</sup>C to 16<sup>0</sup>C and the  
33 average number of cases per day was lower in high temperature country than low temperature  
34 country with exceptions. The minimum effect of summer temperature may not be effective to  
35 control the pandemic rather need to apply the control measures of COVID-19.

36 **Keywords:** COVID-19; temperature; relative humidity; contact; transmission

37

## 38 **1. Introduction**

39 COVID-19 caused by SARS-CoV-2 is an enveloped, positive sense single stranded  
40 RNA virus of the family *Coronaviridae*, a major pathogen of respiratory illness (Pal et al.,  
41 2020). Since the outbreak of COVID-19 in Wuhan, China on the late December, 2019 (Lu et  
42 al., 2020), it has rapidly spread throughout China and all over the world (Gorbalenya, 2020;  
43 Arab-Mazar et al., 2020; Chen et al., 2020; Huang et al., 2020; Wang et al., 2020a; Holshue  
44 et al., 2020; Wang et al., 2020b). The major contributing factor for this new epidemic was the  
45 importation of COVID-19 cases from epidemic countries. So far, more than 200 countries  
46 and territories have been affected with 1,395,136 confirmed cases and 81,580 deaths,  
47 together with cessation of normal social operations and massive economic loss (WHO,  
48 2020a). Earlier, WHO, observing the current situation across the world, declared COVID-19  
49 as “a pandemic” (WHO, 2020b).

50 The experience of SARS and MERS outbreak differs with COVID-19 in  
51 extensiveness of spread, and death rate but finds similarity in sign-symptoms and  
52 transmission pattern (Wang et al., 2020c). Seasonality of respiratory viral disease is an old  
53 theme that recognized winter as an important factor of influenza like diseases transmission  
54 (Sobsey and Meschke, 2003; Wolkoff, 2018). The transmission of virus is under the influence  
55 of climate conditions e.g., temperature and relative humidity (Hemmes, et al., 1960, Dalziel,  
56 et al. 2018). Several studies found droplet, aerosol, and direct and indirect contact can act as  
57 the major factors in the transmission of SARS like viruses (Peng et al., 2020; Rodríguez-  
58 Morales et al., 2020; To et al., 2020). Survivability of SARS virus in environment and  
59 surfaces is associated with temperature and relative humidity (Chan et al., 2011). High  
60 temperature reduces aerosol but cannot inhibit contact transmission immediately (Lowen et  
61 al., 2008). SARS-CoV-1 and SARS-CoV-2 are able to survive in air and surface for sizable  
62 time periods, thus enabling the virus more capable to affect human (VanDoremalen et al.,  
63 2020). Survival of SARS-CoV-2 in air and surfaces associated with climate with is still  
64 unclear.

65 Although some studies found relationships of climatic conditions with the occurrence  
66 of COVID-19 cases (Wang et al., 2020d, Wang et al., 2020e, Zhu and Xie, 2020), they had  
67 limited option to include high temperature country as the outbreak was mainly circulating in  
68 temperate zone during the early stage of outbreak. Therefore, this study aimed to understand  
69 the possible role of temperature and relative humidity in the occurrence of COVID-19 in 57  
70 countries from tropical and temperate zone.

## 71 **2. Materials and methods**

### 72 **2.1. Data**

73 Countries having at least 500 cumulative cases by March 28, 2020 were selected  
74 for study. Once a country reported at least 10 cases on particular day was considered for data  
75 recording for that day. Date wise metrological parameter, like temperature and relative  
76 humidity were obtained from 57 countries to find out a possible link between COVID-19  
77 cases and metrological data. The highest and the lowest temperature were recorded and the  
78 average of these two data was considered as the daily temperature. The daily relative

79 humidity was recorded as AM (Before mid-day) and PM (After mid-day). The average was  
80 considered as the daily relative humidity.

## 81 **2.2. Source of Data**

82 We extracted information from national and international reports of the outbreak and  
83 metrological data from relevant websites. The daily case reports were documented from  
84 “WHO”, “Worldometer”, and “Kaiser Family Foundation” websites (WHO, 2020c;  
85 Worldometer, 2020; KFF, 2020). The daily temperature and relative humidity data were  
86 recorded from “The Weather Channel”, “Timeanddate” and “Accuweather” websites (The  
87 Weather Channel, 2020; Timeanddate, 2020, Accuweather 2020). All the data taken for this  
88 study were from January 9, 2020 to March 25, 2020.

## 89 **2.3. Statistical Analysis**

90 Natural Log-transformation was performed on total number of daily COVID-19  
91 confirmed cases of 57 countries. Polynomial regression as a quadratic term was done to find  
92 out the relationship between daily average temperature and log transformed daily cases of  
93 COVID-19 as we observed a non-linear relationship during initial data exploration (Bradley  
94 and Srivastava, 1979). However, the linear regression was used to find out the effect of daily  
95 average relative humidity on COVID-19 cases (Matthews, 2014). For a certain country, the  
96 natural log of the average number of cases per day was used, and the linear regression was  
97 done to find out the effect of temperature and relative humidity on the occurrence of COVID-  
98 19 cases.

## 99 **3. Results**

100 The data on average temperature, average relative humidity, and log transformed  
101 confirmed cases per day of COVID-19 in 57 countries are listed in Supplementary Table.  
102 Here, we included 444,405 cases from 57 countries (January 9, 2020 to March 25, 2020). The  
103 daily average lowest and highest temperature was respectively  $-5^{\circ}\text{C}$  in Finland and  $29.9^{\circ}\text{C}$  in  
104 Thailand. Percent relative humidity varied from 30 in Saudi Arabia to 78.8 in Indonesia. Data  
105 suggest relative humidity was fluctuating with large deviation in every country. Except China  
106 (January, February, March), Italy (February, March), Iran (February, March), South Korea  
107 (February, March), France (February, March) and Japan (February, March) all other countries  
108 had COVID-19 cases in March. In China, the early outbreak was in January when average  
109 cases per day were lower than in February and March. Similarly, Italy, Iran, South Korea,  
110 France and Japan had lower average cases per day in February compared to March. Among  
111 the countries, Italy had the lowest and highest average cases per day respectively in February  
112 (average monthly temperature  $7.5^{\circ}\text{C}$ ) and March (average monthly temperature  $9.4^{\circ}\text{C}$ ).

113 In polynomial regression as a quadratic term, no correlation ( $R^2 = 0.031$ ) between the  
114 daily average temperature and the number of cases of COVID-19 was found. The analysis  
115 showed that  $\lg N$  of cases increased as the average temperature rose and started to decline  
116 moderately when temperature reached the peak (Fig. 1). The analysis showed that 98.8%  
117 proportionate cases occurred between  $-0.5^{\circ}\text{C}$  to  $30^{\circ}\text{C}$  and, more restrictively, 93.5% cases  
118 occurred between  $1^{\circ}\text{C}$  to  $16^{\circ}\text{C}$  (Fig. 1). The average relative humidity was also not correlated

119 ( $R^2 = 0.0272$ ) with the occurrence of COVID-19 in linear regression (Fig. 2). However, most  
120 of the low temperature countries had relatively higher average number of cases per day than  
121 high temperature countries (Fig. 3). There were also exceptions. For country-wise analysis,  
122 average monthly observations were used for each country. In linear regression country-wise  
123 analysis revealed no correlation ( $R^2 = 0.0602$ ) between temperature and occurrence of  
124 COVID-19 cases per day (Fig. 3).

#### 125 **4. Discussion**

126 This is the first study that consider the pandemic situation (57 countries including  
127 high and low temperature countries) to draw conclusions on possible association of  
128 temperature and relative humidity with COVID-19 cases. Therefore, the findings of this study  
129 demand importance. No correlation between the daily average temperature and the  
130 occurrence of cases of COVID-19 was observed. Earlier studies found correlation between  
131 temperature and the occurrence of COVID-19 (Wang et al., 2020d, Wang et al., 2020e, Zhu  
132 et al 2020). Wang et al., (2020d) showed that most COVID-19 cases in China occurred  
133 between  $0^{\circ}\text{C}$  to  $10^{\circ}\text{C}$ . Another study analyzed data (January 20, to February 4, 2020) of  
134 COVID-19 cases and revealed that the majority of cases occurred with temperature around  
135  $10^{\circ}\text{C}$  (Wang et al., 2020e). But all these studies obtained data from the early stage of the  
136 outbreak, at best till February when most of the affected countries were in winter. In our  
137 study, temperature varied from  $-24^{\circ}\text{C}$  to  $30.5^{\circ}\text{C}$  in 57 countries. The huge variation of  
138 temperature in analysis found no correlation with COVID-19 cases. We found 93.5%  
139 COVID-19 cases were between  $1^{\circ}\text{C}$  to  $16^{\circ}\text{C}$  as most of cases were from China, Italy, USA,  
140 Iran, Germany, France and Spain where the duration of outbreak is prolong (Supplementary  
141 Table).

142 In country-wise analysis, no correlation was observed between average daily  
143 temperature and average per day cases of COVID-19. However, in general, countries having  
144 high temperature experienced relatively lower occurrence of COVID-19 (Fig. 3) with  
145 exceptions. This is may be due to high temperature countries are at early stage of outbreak.  
146 With the progress of outbreak the number of cases may increase exponentially if proper  
147 control measures are not taken. The transmission was exponential in some developed low-  
148 temperature countries like USA, Italy, Spain, Germany, and France where large scale  
149 community transmission was reported (WHO, 2020a). On the other hand, similar countries  
150 like South Korea, Japan took steps during early stage of the outbreak being quite successful  
151 in limiting virus transmission (Financial Times, 2020). The average daily temperature in  
152 Hong Kong ( $21.7^{\circ}\text{C}$ ) and Brazil ( $23.1^{\circ}\text{C}$ ) was quite similar, but Brazil had relatively higher  
153 number of daily average cases (Supplementary Table ). These findings suggest all countries  
154 for applying proper control measures. However, these exceptions can be interpreted taking  
155 into consideration that virus transmission in an outbreak largely depends on the interventions  
156 taken by each particular government. In addition, duration of outbreak, population density,  
157 other metrological variables, level of awareness in people, and medical facilities are not same  
158 for all countries. Among so many factors, transmission of COVID-19 virus from  
159 asymptomatic is carrier very important. A study has been carried out on the passengers of  
160 Diamond Princess cruise ship, where 50.47% COVID-19 patients were asymptomatic carrier

161 (Mizumoto et al., 2020).Additional study is required to consider many more variables. A  
162 variable relative humidity was considered in our study. Though Wang et al., (2020d) found a  
163 correlation between relative humidity and the occurrence of COVID-19 cases, we could not  
164 confirm this association.A recent study in China Jakarta, Indonesiaalso showed no effect of  
165 relative humidity on COVID-19 occurrence (Tosepu et al., 2020). This observed variation in  
166 results may be due to a variation in the investigated time periods and data size in the different  
167 studies.In addition we observed inconsistent relative humidity in most of the countries in our  
168 study.

169 The stability SARS virus was studied in laboratory, at 22-25°C SARS-CoV is stable  
170 up to five days on plastic surface while rapidly losing activity at 38°C or more (Chan et al.,  
171 2011). SARS-CoV-2 survive in air (3 hours), on plastic and stainless steel surfaces (up to 72  
172 hours) thus contact transmission is facilitated (Van Doremalen et al., 2020), but  
173 investigations of this type associated temperature and humidity are scarce for SARS-CoV-2.  
174 Preliminary evidences indicate that high temperature affect virus transmissibility through  
175 droplet and aerosol (Lowen et al., 2008), but contact transmission cannot be ignored (Van  
176 Doremalen et al, 2020). Therefore, “high temperature” itself is not enough to combat the  
177 pandemic. The primary epicenter in Wuhan, Chinaalready has proved that the virus is  
178 controllable in a low-temperature region (WHO, 2020d). We suggest that all countries should  
179 follow control measures similar to those adopted in China, taking into account that  
180 temperature increments will not be enough.

## 181 **5. Conclusions**

182 To the best of our knowledge, this is the first study describing temperature and relative  
183 humidity has no major effect to describe on the current COVID-19 pandemic. More studies  
184 needed to which variables are contributing most. Current study suggests all countries not to  
185 depend on summer rather to implement possible all control measures of COVID-19.

186

## 187 **Conflict of interest**

188 All the authors report no conflicts of interest in this paper.

189

## 190 **Funding**

191 No funding.

192

## 193 **Author's contribution**

194

195 MTR and MAS designed the study. MAS, MSI and MEH collected data. MAS, MEH and  
196 MTI analyzed and interpreted the data. MAS, MSI, AT, MTI, AMMTR and MTR drafted the  
197 manuscript. MAS, MTI, AT, AMMTR and MTR critically reviewed and updated the  
198 manuscript to its final version. The final version of the manuscript was approved by all  
199 authors.

200 **Figure and Table legends**

201 Figure 1. The relationship between average temperature and COVID-19 cases (natural log  
202 transformed) in 57 countries

203 Figure 2.The relationship between average relative humidity and COVID-19 cases (natural  
204 log transformed) in 57 countries

205 Figure 3. Country-wise log transformed average cases of COVID-19 per day v.s. average  
206 temperature in 57 countries

207 Supplementary Table legend:

208 Supplementary Table: Average temperature, relative humidity and COVID-19 cases in 57  
209 countries

210

211 **Figure and Supplementary Table legend:**

212

213 Figure 1. The relationship between average temperature and COVID-19 cases (natural log  
214 transformed) in 57 countries

215 Figure 2.The relationship between average relative humidity and COVID-19 cases (natural  
216 log transformed) in 57 countries

217 Figure 3. Country-wise log transformed average cases of COVID-19 per day v.s. average  
218 temperature in 57 countries.

219 Supplementary Table legend:

220 Supplementary Table: Average temperature, relative humidity and COVID-19 cases in 57  
221 countries

222

223

224

225

226

227

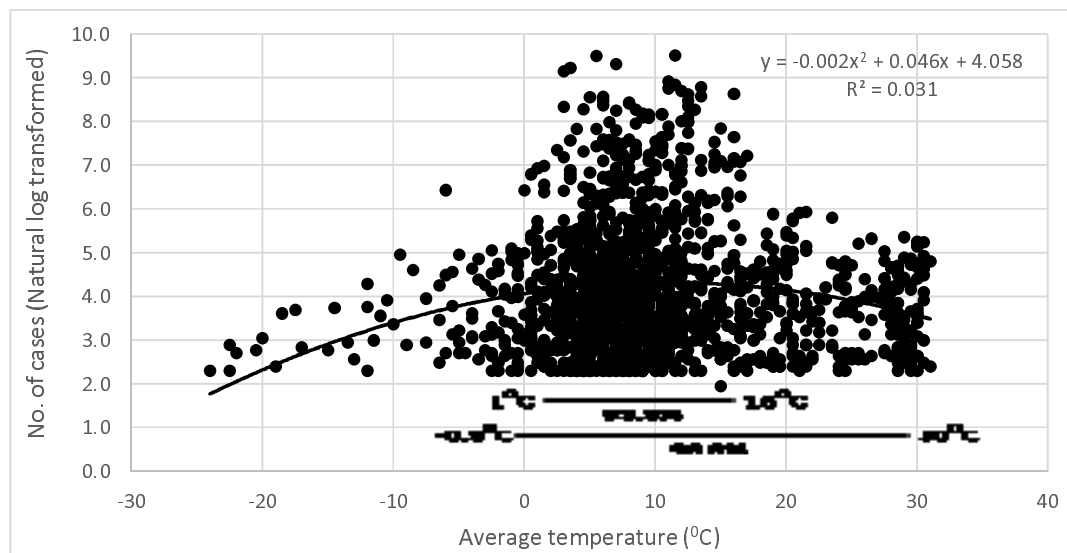

228

229 Figure 1. The relationship between average temperature and COVID-19 cases (natural log  
230 transformed) in 57 countries.

231

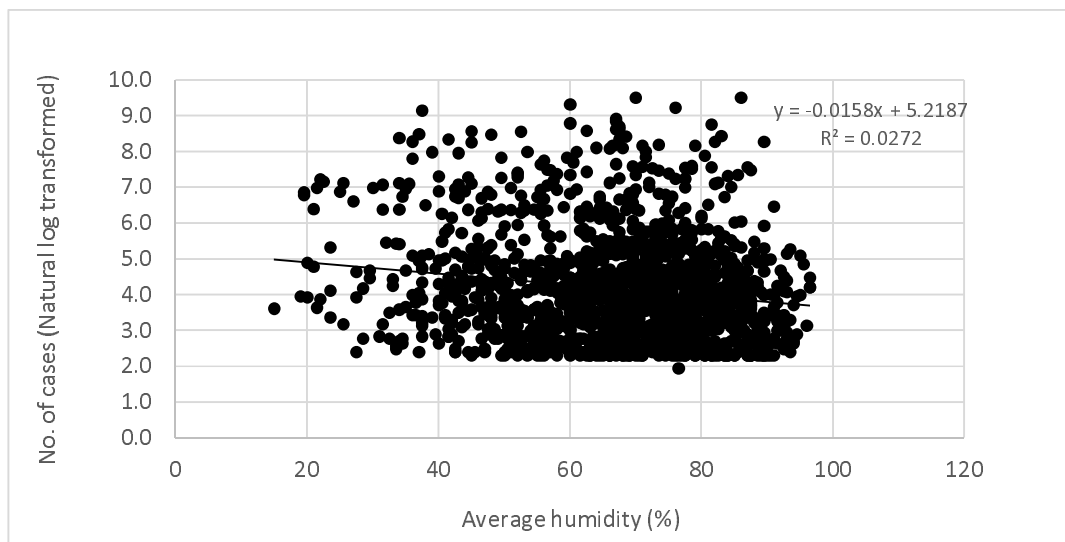

232

233 Figure 2. The relationship between average relative humidity and COVID-19 cases (natural  
234 log transformed) in 57 countries.

235



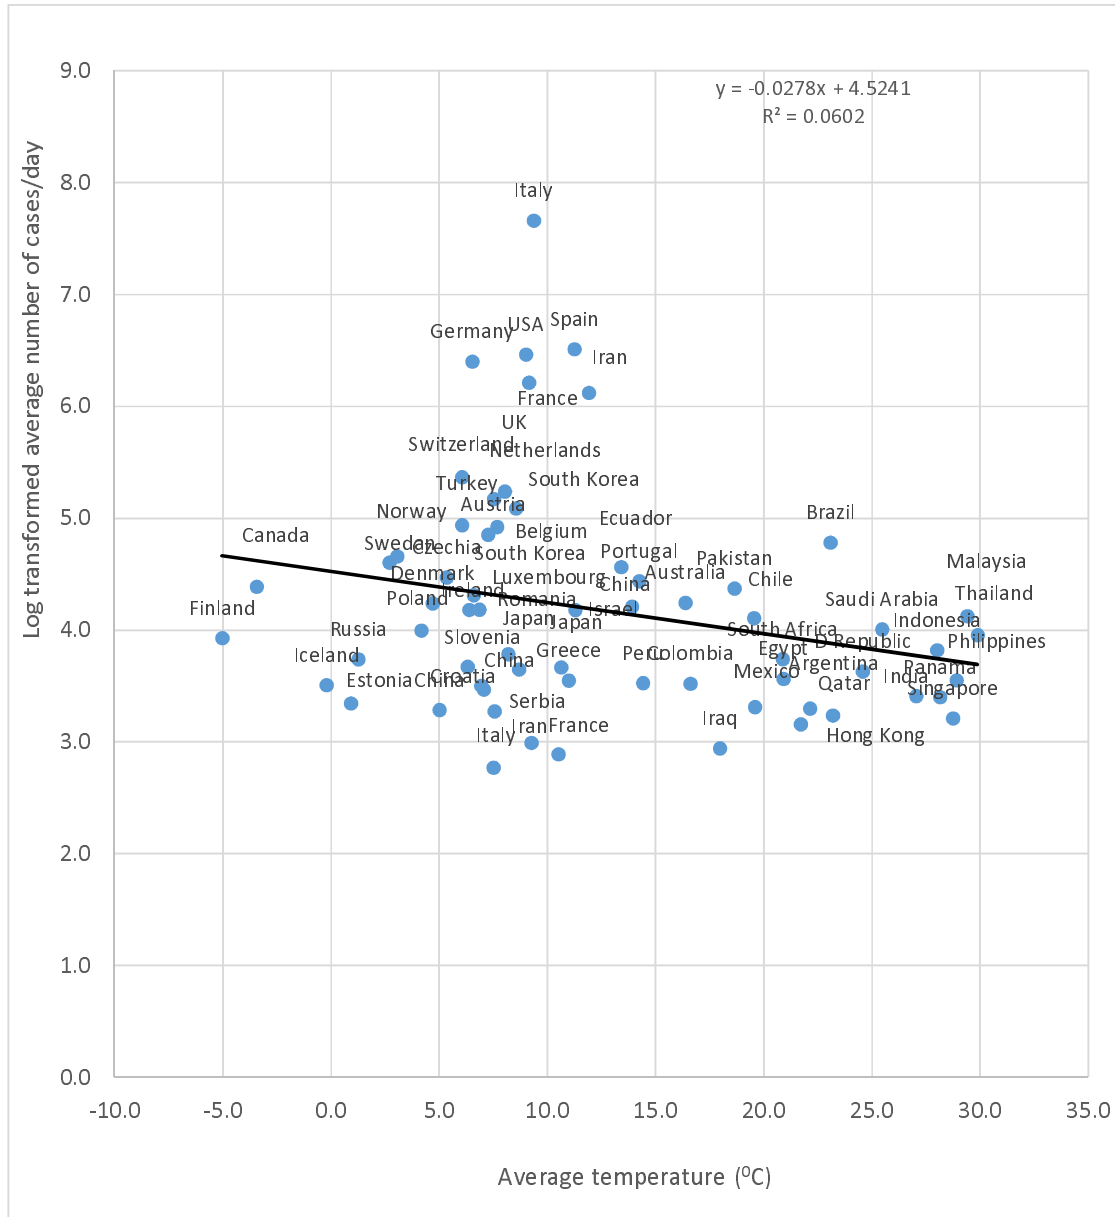

236

237 Figure 3. Country-wise log transformed average cases of COVID-19 per day v.s. average  
238 temperature in 57 countries.

239

240

241

242

243

244 Supplementary Table 1. Average temperature, relative humidity and COVID-19 cases in 57 countries

| Country   | Month | Number of Reports | Temperature |          |           |                    | Relative Humidity |          |          |                      | COVID-19 Cases |          |         |                    |
|-----------|-------|-------------------|-------------|----------|-----------|--------------------|-------------------|----------|----------|----------------------|----------------|----------|---------|--------------------|
|           |       |                   | Mini mum    | Maxi mum | Ave rag e | Standard Deviation | Mini mum          | Maxi mum | Aver age | Stand ard Devia tion | Mini mum       | Maxim um | Average | Standard Deviation |
| Argentina | March | 12                | 19.5        | 24.5     | 22.1      | 1.9                | 60.5              | 84.0     | 72.5     | 6.9                  | 2.4            | 4.8      | 3.3     | 0.9                |
| Australia | March | 19                | 12.5        | 21.5     | 16.4      | 2.3                | 58.5              | 89.5     | 69.0     | 8.2                  | 2.5            | 6.3      | 4.2     | 1.3                |
| Austria   | March | 21                | .5          | 15.5     | 7.7       | 4.4                | 46.0              | 78.5     | 60.0     | 9.0                  | 2.5            | 6.8      | 4.9     | 1.4                |
| Belgium   | March | 22                | 3.5         | 13.0     | 7.3       | 2.3                | 38.0              | 93.5     | 71.7     | 16.3                 | 2.3            | 6.5      | 4.9     | 1.2                |
| Brazil    | March | 14                | 20.5        | 25.5     | 23.1      | 2.0                | 64.0              | 80.5     | 72.9     | 4.9                  | 2.9            | 5.9      | 4.8     | 1.1                |
| Canada    | March | 18                | -9.5        | 2.5      | -3.4      | 3.5                | 48.5              | 88.0     | 65.8     | 11.7                 | 2.3            | 6.6      | 4.4     | 1.4                |
| Chile     | March | 13                | 15.5        | 22.0     | 19.5      | 1.7                | 40.0              | 70.5     | 52.3     | 8.2                  | 2.4            | 5.4      | 4.1     | 1.0                |
| China     | Feb   | 373               | -24.0       | 18.0     | 6.3       | 6.4                | 15.0              | 96.5     | 71.2     | 14.9                 | 2.3            | 9.5      | 3.7     | 1.3                |
| China     | Jan   | 143               | -12.0       | 14.5     | 5.0       | 3.4                | 37.5              | 96.0     | 70.0     | 14.2                 | 2.3            | 6.8      | 3.3     | 0.9                |

|            |       |    |       |      |      |     |      |      |      |      |     |     |     |     |
|------------|-------|----|-------|------|------|-----|------|------|------|------|-----|-----|-----|-----|
| China      | March | 25 | 7.5   | 20.0 | 13.9 | 3.7 | 44.5 | 85.5 | 67.3 | 9.9  | 2.5 | 6.4 | 4.2 | 0.9 |
| Colombia   | March | 10 | 15.0  | 17.5 | 16.6 | 0.8 | 72.5 | 83.5 | 76.9 | 4.3  | 2.4 | 4.6 | 3.5 | 0.8 |
| Croatia    | March | 10 | .5    | 12.5 | 7.1  | 5.1 | 42.5 | 86.5 | 63.3 | 14.8 | 2.4 | 4.4 | 3.5 | 0.7 |
| Czechia    | March | 15 | -1.0  | 11.0 | 5.3  | 4.1 | 43.5 | 90.5 | 64.2 | 14.2 | 3.1 | 5.6 | 4.5 | 0.8 |
| Denmark    | March | 19 | 1.5   | 7.0  | 4.7  | 1.6 | 54.5 | 93.0 | 73.6 | 12.5 | 2.5 | 5.5 | 4.2 | 0.8 |
| D Republic | March | 8  | 24.0  | 25.0 | 24.6 | 0.3 | 61.5 | 76.0 | 70.9 | 4.6  | 2.3 | 4.5 | 3.6 | 0.8 |
| Ecuador    | March | 10 | 10.5  | 16.5 | 13.4 | 1.9 | 62.5 | 77.5 | 70.5 | 5.0  | 3.0 | 5.5 | 4.6 | 0.7 |
| Egypt      | March | 10 | 16.5  | 27.5 | 20.9 | 3.7 | 34.0 | 55.5 | 43.1 | 7.6  | 2.6 | 4.1 | 3.6 | 0.4 |
| Estonia    | March | 11 | -2.5  | 5.5  | 0.9  | 2.5 | 53.0 | 89.5 | 65.7 | 11.9 | 2.8 | 4.1 | 3.3 | 0.5 |
| Finland    | March | 14 | -12.0 | .5   | -5.0 | 3.5 | 55.0 | 89.5 | 70.8 | 10.6 | 2.7 | 4.6 | 3.9 | 0.7 |
| France     | Feb   | 1  | 10.5  | 10.5 | 10.5 |     | 88.5 | 88.5 | 88.5 |      | 2.9 | 2.9 | 2.9 |     |
| France     | March | 25 | 5.5   | 14.5 | 9.1  | 2.8 | 36.0 | 89.5 | 74.2 | 14.8 | 3.0 | 8.3 | 6.2 | 1.4 |
| Germany    | March | 25 | 3.0   | 12.5 | 6.5  | 2.8 | 34.0 | 85.0 | 63.1 | 13.8 | 3.3 | 8.4 | 6.4 | 1.7 |
| Greece     | March | 19 | 7.5   | 16.5 | 11.0 | 2.5 | 36.0 | 73.0 | 57.0 | 11.8 | 2.3 | 4.6 | 3.5 | 0.7 |

|            |       |    |      |      |      |     |      |      |      |      |     |     |     |     |
|------------|-------|----|------|------|------|-----|------|------|------|------|-----|-----|-----|-----|
| Hong Kong  | March | 10 | 19.5 | 24.5 | 21.7 | 1.8 | 68.0 | 87.0 | 78.1 | 5.7  | 2.3 | 3.9 | 3.2 | 0.5 |
| Iceland    | March | 16 | -3.5 | 2.5  | -0.2 | 1.9 | 47.0 | 86.5 | 72.6 | 10.0 | 2.4 | 4.6 | 3.5 | 0.7 |
| India      | March | 15 | 21.5 | 30.5 | 27.0 | 2.7 | 63.0 | 73.0 | 70.1 | 3.0  | 2.5 | 4.8 | 3.4 | 0.8 |
| Indonesia  | March | 14 | 26.0 | 29.0 | 28.0 | 0.9 | 71.0 | 85.5 | 78.8 | 3.5  | 2.6 | 4.7 | 3.8 | 0.7 |
| Iran       | Feb   | 16 | 4.5  | 15.0 | 9.3  | 2.9 | 37.5 | 91.0 | 63.4 | 14.3 | 2.3 | 4.2 | 3.0 | 0.5 |
| Iran       | March | 32 | 7.0  | 17.0 | 11.9 | 2.7 | 19.5 | 85.5 | 41.2 | 17.0 | 2.4 | 7.7 | 6.1 | 1.6 |
| Iraq       | March | 13 | 12.5 | 21.5 | 18.0 | 2.5 | 33.5 | 76.5 | 56.1 | 12.8 | 2.3 | 3.9 | 2.9 | 0.5 |
| Ireland    | March | 16 | 3.5  | 10.5 | 6.4  | 2.4 | 68.0 | 86.0 | 77.8 | 5.7  | 2.5 | 5.5 | 4.2 | 1.0 |
| Israel     | March | 18 | 5.5  | 18.5 | 11.3 | 3.5 | 50.0 | 83.5 | 71.6 | 8.5  | 2.5 | 6.2 | 4.2 | 1.2 |
| Italy      | Feb   | 4  | 6.5  | 9.5  | 7.5  | 1.4 | 63.0 | 85.0 | 74.1 | 9.0  | 2.3 | 3.4 | 2.8 | 0.6 |
| Italy      | March | 25 | 4.5  | 15.0 | 9.4  | 2.9 | 40.0 | 80.5 | 62.6 | 11.1 | 5.8 | 8.8 | 7.7 | 0.9 |
| Japan      | Feb   | 14 | 3.0  | 12.5 | 8.7  | 2.7 | 37.0 | 91.5 | 59.6 | 16.7 | 2.3 | 4.6 | 3.6 | 0.8 |
| Japan      | March | 24 | 6.5  | 16.5 | 10.6 | 2.7 | 32.5 | 87.5 | 60.9 | 15.2 | 2.7 | 4.7 | 3.7 | 0.5 |
| Luxembourg | March | 13 | 3.5  | 12.0 | 6.8  | 3.3 | 32.0 | 81.5 | 63.1 | 18.2 | 2.5 | 5.5 | 4.2 | 1.1 |

|              |       |    |      |      |      |     |      |      |      |      |     |     |     |     |
|--------------|-------|----|------|------|------|-----|------|------|------|------|-----|-----|-----|-----|
| Malaysia     | March | 19 | 27.5 | 30.5 | 29.4 | 1.0 | 62.0 | 87.0 | 78.1 | 6.9  | 2.3 | 5.4 | 4.1 | 1.0 |
| Mexico       | March | 12 | 17.5 | 21.5 | 19.6 | 1.2 | 21.5 | 55.0 | 40.6 | 10.4 | 2.4 | 4.2 | 3.3 | 0.6 |
| Netherlands  | March | 22 | 5.0  | 10.5 | 7.5  | 1.7 | 42.5 | 91.5 | 73.2 | 14.7 | 2.6 | 6.7 | 5.2 | 1.1 |
| Norway       | March | 22 | -2.0 | 7.5  | 3.0  | 2.5 | 38.5 | 93.5 | 71.5 | 17.1 | 3.0 | 5.5 | 4.7 | 0.9 |
| Pakistan     | March | 11 | 16.5 | 20.5 | 18.6 | 1.4 | 62.5 | 77.5 | 68.3 | 5.3  | 3.1 | 5.4 | 4.4 | 0.6 |
| Panama       | March | 11 | 26.5 | 28.5 | 28.1 | 0.6 | 64.5 | 75.0 | 67.6 | 2.9  | 2.5 | 4.6 | 3.4 | 0.7 |
| Peru         | March | 11 | 13.0 | 16.0 | 14.4 | 1.0 | 48.0 | 92.5 | 77.4 | 11.8 | 2.3 | 4.5 | 3.5 | 0.7 |
| Philippines  | March | 15 | 27.5 | 30.0 | 28.9 | 0.7 | 52.5 | 71.0 | 63.1 | 5.5  | 2.3 | 4.7 | 3.6 | 0.9 |
| Poland       | March | 15 | -2.0 | 10.5 | 4.2  | 4.6 | 41.0 | 77.5 | 60.5 | 13.6 | 2.8 | 5.0 | 4.0 | 0.8 |
| Portugal     | March | 17 | 11.5 | 16.5 | 14.2 | 1.4 | 59.0 | 86.0 | 74.0 | 7.3  | 1.9 | 6.5 | 4.4 | 1.5 |
| Qatar        | March | 11 | 20.0 | 25.5 | 23.2 | 1.8 | 42.0 | 72.5 | 60.4 | 9.0  | 2.3 | 5.5 | 3.2 | 1.0 |
| Romania      | March | 14 | 1.5  | 14.5 | 8.2  | 4.3 | 37.5 | 87.5 | 59.9 | 15.9 | 2.3 | 5.4 | 3.8 | 0.9 |
| Russia       | March | 12 | -3.0 | 6.5  | 1.3  | 3.3 | 36.0 | 75.0 | 54.3 | 11.8 | 2.6 | 5.1 | 3.7 | 0.7 |
| Saudi Arabia | March | 12 | 23.0 | 29.5 | 25.5 | 2.1 | 20.0 | 51.5 | 30.0 | 10.1 | 2.7 | 5.3 | 4.0 | 0.8 |

|              |       |    |      |      |      |     |      |      |      |      |     |     |     |     |
|--------------|-------|----|------|------|------|-----|------|------|------|------|-----|-----|-----|-----|
| Serbia       | March | 11 | -5   | 14.0 | 7.5  | 5.3 | 45.0 | 91.0 | 60.1 | 13.1 | 2.3 | 4.4 | 3.3 | 0.7 |
| Singapore    | March | 17 | 26.5 | 30.0 | 28.7 | 0.9 | 69.0 | 84.0 | 76.0 | 4.8  | 2.3 | 4.3 | 3.2 | 0.6 |
| Slovenia     | March | 14 | .5   | 13.5 | 6.9  | 4.4 | 41.0 | 87.0 | 60.6 | 14.4 | 2.4 | 4.0 | 3.5 | 0.4 |
| South Africa | March | 11 | 18.5 | 22.5 | 20.9 | 1.2 | 51.0 | 81.0 | 65.3 | 8.3  | 2.4 | 5.0 | 3.7 | 1.0 |
| South Korea  | Feb   | 6  | 5.0  | 8.0  | 6.6  | 1.4 | 40.0 | 52.5 | 45.8 | 5.8  | 2.9 | 5.3 | 4.3 | 1.0 |
| South Korea  | March | 25 | 4.5  | 14.5 | 8.5  | 2.8 | 29.5 | 80.5 | 49.9 | 13.2 | 3.6 | 6.7 | 5.1 | 0.8 |
| Spain        | March | 25 | 6.5  | 16.5 | 11.2 | 2.7 | 44.5 | 82.0 | 63.3 | 11.5 | 3.3 | 8.9 | 6.5 | 1.9 |
| Swedan       | March | 21 | -1.0 | 6.5  | 2.7  | 2.2 | 33.5 | 94.0 | 72.3 | 16.4 | 2.6 | 5.5 | 4.6 | 0.7 |
| Switzerland  | March | 24 | 1.0  | 11.0 | 6.0  | 2.8 | 51.0 | 88.5 | 71.3 | 9.9  | 2.7 | 7.2 | 5.4 | 1.4 |
| Thailand     | March | 12 | 26.5 | 31.0 | 29.9 | 1.4 | 70.0 | 87.5 | 75.0 | 4.9  | 2.4 | 5.2 | 4.0 | 0.9 |
| Turkey       | March | 11 | -5   | 11.5 | 6.0  | 4.7 | 45.5 | 80.5 | 59.4 | 9.4  | 2.5 | 6.3 | 4.9 | 1.2 |
| UK           | March | 23 | 5.0  | 12.5 | 8.0  | 1.9 | 44.5 | 92.0 | 73.0 | 14.1 | 2.4 | 7.3 | 5.2 | 1.4 |
| USA          | March | 24 | 3.0  | 16.0 | 9.0  | 3.4 | 31.5 | 83.0 | 52.2 | 15.9 | 3.0 | 9.5 | 6.5 | 2.1 |

246 **References:**

- 247 Accuweather, 2020. <https://www.accuweather.com/en> (accessed 26 March, 2020).
- 248 Arab-Mazar, Z., Sah, R., Rabaan, A.A., Dhama, K., Rodríguez-Morales, A.J., 2020. Mapping  
249 the incidence of the COVID-19 hotspot in Iran–Implications for Travellers. *Travel. Med.*  
250 *Infect. Dis.* 101630. <https://doi.org/10.1016/j.tmaid.2020.101630>.
- 251 Bradley, R.A., Srivastava, S.S., 1979. Correlation in polynomial regression. *Am. Stat.* 33, 11-  
252 14. <https://doi.org/10.1080/00031305.1979.10482644>.
- 253 Chan, K.H., Peiris, J.S., Lam, S.Y., Poon, L.L., Yuen, K.Y., Seto, W.H., 2011. The effects of  
254 temperature and relative humidity on the viability of the SARS coronavirus. *Adv. Virol.*  
255 2011, 734690. <https://doi.org/10.1155/2011/734690>.
- 256 Chen, N., Zhou, M., Dong, X., Qu J., Gong, F., Han, Y., Qiu Y., Wang, J., Liu, Y., Wei, Y.,  
257 Yu, T., 2020. Epidemiological and clinical characteristics of 99 cases of 2019 novel  
258 coronavirus pneumonia in Wuhan, China: a descriptive study. *The Lancet.* 395, 507-513.  
259 [https://doi.org/10.1016/S0140-6736\(20\)30211-7](https://doi.org/10.1016/S0140-6736(20)30211-7).
- 260 Dalziel, B.D., Kissler, S., Gog, J.R., Viboud, C., Bjørnstad, O.N., Metcalf, C.J., Grenfell,  
261 B.T., 2018. Urbanization and humidity shape the intensity of influenza epidemics in US  
262 cities. *Science.* 362, 75-9. <https://doi.org/10.1126/science.aat6030>.
- 263 Financial Times, 2020. Containing coronavirus: lessons from Asia.  
264 <https://www.ft.com/content/e015e096-6532-11ea-a6cd-df28cc3c6a68> (Accessed 7 April,  
265 2020).
- 266 Gorbalenya, A.E., 2020. Severe acute respiratory syndrome-related coronavirus–The species  
267 and its viruses, a statement of the Coronavirus Study Group. *BioRxiv.*  
268 <https://doi.org/10.1101/2020.02.07.937862>.
- 269 Hemmes, J.H., Winkler, K., Kool, S.M., 1960. Virus survival as a seasonal factor in influenza  
270 and poliomyelitis. *Nature.* 188, 430-431. <https://doi.org/10.1038/188430a0>.
- 271 Holshue, M.L., DeBolt, C., Lindquist, S., Lofy, K.H., Wiesman, J., Bruce, H., Spitters, C.,  
272 Ericson, K., Wilkerson, S., Tural, A., Diaz, G., 2020. First case of 2019 novel coronavirus in  
273 the United States. *N. Engl. J. Med.* 382, 929-936. <https://doi.org/10.1056/NEJMoa2001191>.
- 274 Huang, C., Wang, Y., Li, X., Ren, L., Zhao, J., Hu, Y., Zhang, L., Fan, G., Xu, J., Gu, X.,  
275 Cheng, Z., 2020. Clinical features of patients infected with 2019 novel coronavirus in Wuhan,  
276 China. *The Lancet.* 395, 497-506. [https://doi.org/10.1016/S0140-6736\(20\)30183-5](https://doi.org/10.1016/S0140-6736(20)30183-5).
- 277 KFF, 2020. Global Health Policy. COVID-19 Coronavirus Tracker.  
278 <https://www.kff.org/global-health-policy/fact-sheet/coronavirus-tracker/> (accessed 26 March,  
279 2020).
- 280 Lowen, A.C., Steel, J., Mubareka, S., Palese, P., 2008. High temperature (30 C) blocks  
281 aerosol but not contact transmission of influenza virus. *J. Virol.* 82, 5650-5652.  
282 <https://doi.org/10.1128/JVI.00325-08>.

- 283 Lu, H., Stratton, C.W., Tang, Y.W., 2020. Outbreak of Pneumonia of Unknown Etiology in  
284 Wuhan China: the Mystery and the Miracle. *J.Med.Virol.* 92, 401–402.  
285 <https://doi.org/10.1002/jmv.25678>.
- 286 Matthews, D.E., 2014. Multiple linear regression. Wiley StatsRef: Statistics Reference  
287 Online. <https://doi.org/10.1002/9781118445112.stat05766>.
- 288 Mizumoto, K., Kagaya, K., Zarebski, A., Chowell, G., 2020. Estimating the asymptomatic  
289 proportion of coronavirus disease 2019 (COVID-19) cases on board the Diamond Princess  
290 Cruise ship, Yokohama, Japan, 2020. *Eurosurveillance.* 25, 2000180.  
291 <https://doi.org/10.2807/1560-7917.ES.2020.25.10.2000180>.
- 292 Pal, M., Berhanu, G., Desalegn, C., Kandi, V., 2020. Severe Acute Respiratory Syndrome  
293 Coronavirus-2 (SARS-CoV-2): An Update. *Cureus.* 26, e7423.  
294 <https://doi.org/10.7759/cureus.7423>.
- 295 Peng, X., Xu, X., Li, Y., Cheng, L., Zhou, X., Ren, B., 2020. Transmission routes of 2019-  
296 nCoV and controls in dental practice. *Int. J. Oral. Sci.* 12, 1-6.  
297 <https://doi.org/10.1038/s41368-020-0075-9>.
- 298 Rodríguez-Morales, A.J., MacGregor, K., Kanagarajah, S., Patel, D., Schlagenhauf, P., 2020.  
299 Going global-Travel and the 2019 novel coronavirus. *Travel. Med. Infect. Dis.* 33,101578.  
300 <https://doi.org/10.1016/j.tmaid.2020.101578>.
- 301 Sobsey, M.D., Meschke, J.S., 2003. Virus survival in the environment with special attention  
302 to survival in sewage droplets and other environmental media of fecal or respiratory origin.  
303 Report for the World Health Organization, Geneva, Switzerland.
- 304 The Weather Channel, 2020. Monthly Weather, <https://weather.com/> (accessed 26 March,  
305 2020).
- 306 Timeanddate, 2020. World Temperatures — Weather around the World,  
307 <https://www.timeanddate.com/weather/> (accessed 26 March, 2020).
- 308 To, K.K., Tsang, O.T., Chik-Yan Yip, C., Chan, K.H., Wu, T.C., Chan, J., Leung, W.S.,  
309 Chik, T.S., Choi, C.Y., Kandamby, D.H., Lung, D.C., 2020. Consistent detection of 2019  
310 novel coronavirus in saliva. *Clin. Infect. Dis.* <https://doi.org/10.1093/cid/ciaa149>.
- 311 Tosepu, R., Gunawan J., Effendy, D.S., Ahmad L.O.A.I., Lestari, H., Bahar, H., Asfian, P.,  
312 2020. Correlation between weather and Covid-19 pandemic in Jakarta, Indonesia. *Sci. Total.*  
313 *Environ.* <https://doi.org/10.1016/j.scitotenv.2020.138436>.
- 314 Van Doremalen, N., Bushmaker, T., Morris, D., Holbrook, M., Gamble, A., Williamson, B.,  
315 Tamin, A., Harcourt, J., Thornburg, N., Gerber, S., Lloyd-Smith, J., 2020. Aerosol and  
316 surface stability of HCoV-19 (SARS-CoV-2) compared to SARS-CoV-1.N. *Engl. J. Med.*  
317 <https://doi.org/10.1056/NEJMc2004973>.
- 318 Wang, C., Horby, P.W., Hayden, F.G., Gao, G.F., 2020a. A novel coronavirus outbreak of  
319 global health concern. *The Lancet.* 395, 470-473. [https://doi.org/10.1016/S0140-  
320 6736\(20\)30185-9](https://doi.org/10.1016/S0140-6736(20)30185-9).



- 321 Wang, D., Hu, B., Hu, C., Zhu, F., Liu, X., Zhang, J., Wang, B., Xiang, H., Cheng, Z., Xiong,  
322 Y., Zhao, Y., 2020b. Clinical characteristics of 138 hospitalized patients with 2019 novel  
323 coronavirus-infected pneumonia in Wuhan, China. JAMA. 323, 1061-1069.  
324 <https://doi.org/10.1001/jama.2020.1585>.
- 325 Wang, J., Tang, K., Feng, K., Lv, W., 2020d. High Temperature and High Humidity Reduce  
326 the Transmission of COVID-19. <http://dx.doi.org/10.2139/ssrn.3551767>.
- 327 Wang, M., Jiang, A., Gong, L., Luo, L., Guo, W., Li, C., Zheng, J., Li, C., Yang, B., Zeng, J.,  
328 Chen, Y., 2020e. Temperature significantly change COVID-19 Transmission in 429 cities.  
329 MedRxiv. <https://doi.org/10.1101/2020.02.22.20025791>.
- 330 Wang, Y., Wang, Y., Chen, Y., Qin, Q., 2020c. Unique epidemiological and clinical features  
331 of the emerging 2019 novel coronavirus pneumonia (COVID-19) implicate special control  
332 measures. J.Med.Virol. 2020, 1-9. <https://doi.org/10.1002/jmv.25748>.
- 333 Wolkoff, P., 2018. Indoor air humidity, air quality, and health—An overview. Int.J.Hyg.  
334 Environ. Health. 221, 376-390. <https://doi.org/10.1016/j.ijheh.2018.01.015>.
- 335 World Health Organization (WHO), 2020a. Novel Coronavirus (2019-nCoV) situation  
336 report-79. [https://www.who.int/docs/default-source/coronaviruse/situation-reports/20200408-](https://www.who.int/docs/default-source/coronaviruse/situation-reports/20200408-sitrep-79-covid-19.pdf?sfvrsn=4796b143_6)  
337 [sitrep-79-covid-19.pdf?sfvrsn=4796b143\\_6](https://www.who.int/docs/default-source/coronaviruse/situation-reports/20200408-sitrep-79-covid-19.pdf?sfvrsn=4796b143_6) (accessed 9 April, 2020).
- 338 World Health Organization (WHO), 2020b. Coronavirus disease (COVID-2019) press  
339 briefings: WHO Emergencies Press Conference on coronavirus disease outbreak – 11 March  
340 2020. [https://www.who.int/emergencies/diseases/novel-coronavirus-2019/media-](https://www.who.int/emergencies/diseases/novel-coronavirus-2019/media-resources/press-briefings)  
341 [resources/press-briefings](https://www.who.int/emergencies/diseases/novel-coronavirus-2019/media-resources/press-briefings) (accessed 7 April, 2020).
- 342 World Health Organization (WHO), 2020c. Coronavirus disease (COVID-19) Pandemic.  
343 <https://www.who.int/emergencies/diseases/novel-coronavirus-2019> (accessed 8 April, 2020).
- 344 World Health Organization (WHO), 2020d. Report of the WHO-China Joint Mission on  
345 Coronavirus Disease 2019 (COVID-19). [https://www.who.int/docs/default-](https://www.who.int/docs/default-source/coronaviruse/who-china-joint-mission-on-covid-19-final-report.pdf)  
346 [source/coronaviruse/who-china-joint-mission-on-covid-19-final-report.pdf](https://www.who.int/docs/default-source/coronaviruse/who-china-joint-mission-on-covid-19-final-report.pdf) (accessed 7 April,  
347 2020).
- 348 Worldometer, 2020. COVID-19 coronavirus outbreak.  
349 <https://www.worldometers.info/coronavirus/> (accessed 7 April, 2020).
- 350 Zhu, Y., and Xie, J., 2020. Association between ambient temperature and COVID-19  
351 infection in 122 cities from China. Sci. Total. Environ. 138201.  
352 <https://doi.org/10.1016/j.scitotenv.2020.138201>.
- 353
- 354
- 355
- 356
